# Supplementary material for: Tumor homing and penetrating peptide-conjugated niosomes as multi-drug carriers for tumor-targeted drug delivery
Source: Royal Society of Chemistry journal article supplement (doi:10.1039/c7ra05071b), 2017-01-01
Supplement: c7ra05071b1.pdf [file c7ra05071b1.pdf]

Electronic Supplementary Information

RSC Advances

**Tumor homing and penetrating peptide-conjugated niosomes as multi-drug carriers for tumor-targeted drug delivery**

**Didem Ag Seleci,<sup>a</sup> Muharrem Seleci,<sup>a</sup> Frank Stahl,<sup>a\*</sup> and Thomas Scheper<sup>a</sup>**

<sup>a</sup>Leibniz University Hannover, Institute for Technical Chemistry, 30167 Hannover/Germany

\*Corresponding author. Leibniz University Hannover, Institute for Technical Chemistry, 30167

Hannover/Germany

Phone: +49 511 762 2968 ; Fax: +49 511 762 3004

E-mail address: [stahl@iftc.uni-hannover.de](mailto:stahl@iftc.uni-hannover.de)

## Figures

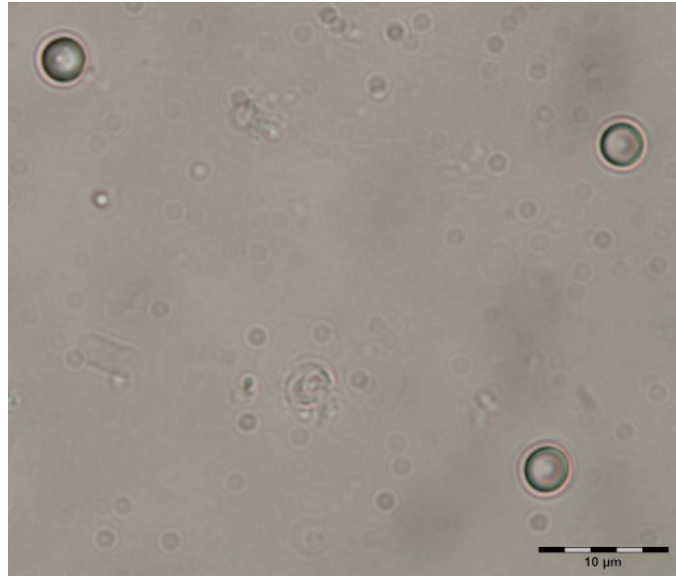

**Figure S1.** Optical micrographs of PEGNIO. Scale bar 10 μm.
